# Supplementary material for: Bridging the gaps between particulate backscattering measurements and modeled particulate organic carbon in the ocean
Source: Copernicus journal article supplement (doi:10.5194/bg-2021-201), 2021-08-18
Supplement: Supplementary file 1 [file bg-2021-201-supplement.pdf]

## Supplemental figures

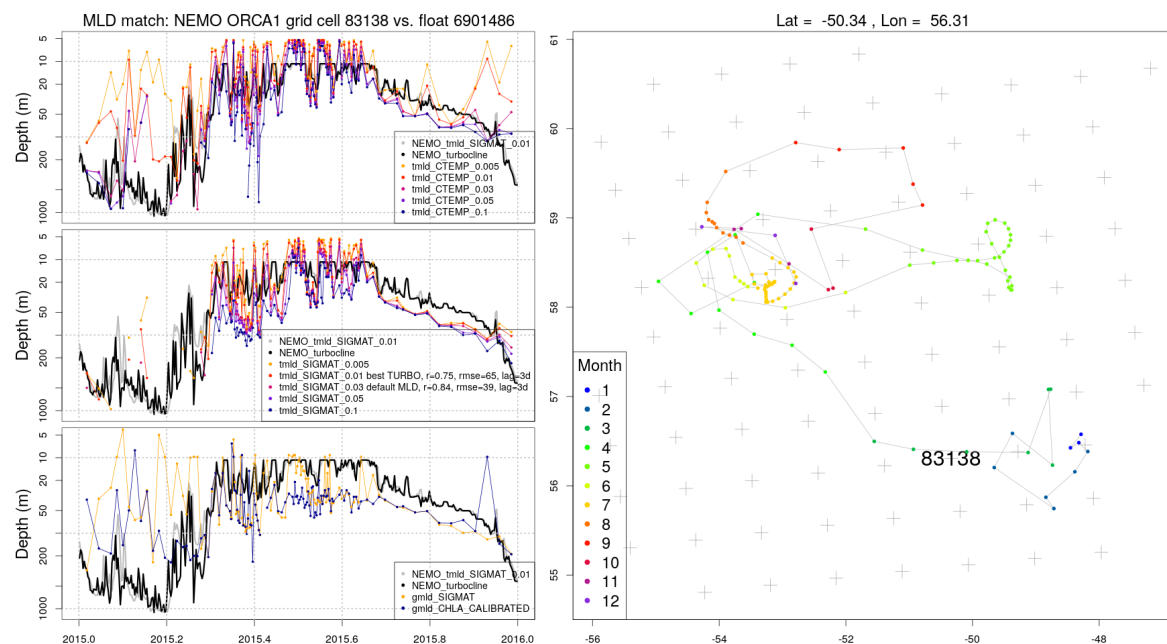

**Figure S1. Comparison of NEMO turbocline depth in one model cell (83138) and the MLD recorded by a BGC-Argo float over one year. Observed MLD is estimated with 12 different metrics: temperature thresholds of 0.005, 0.01, 0.03, 0.05 and 0.1 °C from 5 m (top left); density thresholds of 0.005, 0.01, 0.03, 0.05 and 0.1 kg m<sup>-3</sup> from 5 m (center left); and highest density and Chla fluorescence gradients (bottom left). A density threshold of 0.03 kg m<sup>-3</sup> from the 5-m reference depth is used as the default criterion to evaluate the comparison with different skill metrics. This figure corresponds to float WMO 6901486 in the Labrador Sea, year 2015, compared to model grid cell 83138 (Fig. 6 of the main text). The gaps in the MLD lines for BGC-Argo observations indicate that the MLD was deeper than 1000 m for a given MLD criterion. Only the finest MLD criteria detected stratification shallower than 1000 m during the winter convection season (approximately, February and March). Analogous figures were made for all the model grid cells visited by the float (shown in the right panel) and used to compute the corresponding MLD skill metrics (Fig. S2-S4), for all the coherent annual time series (CATS).**

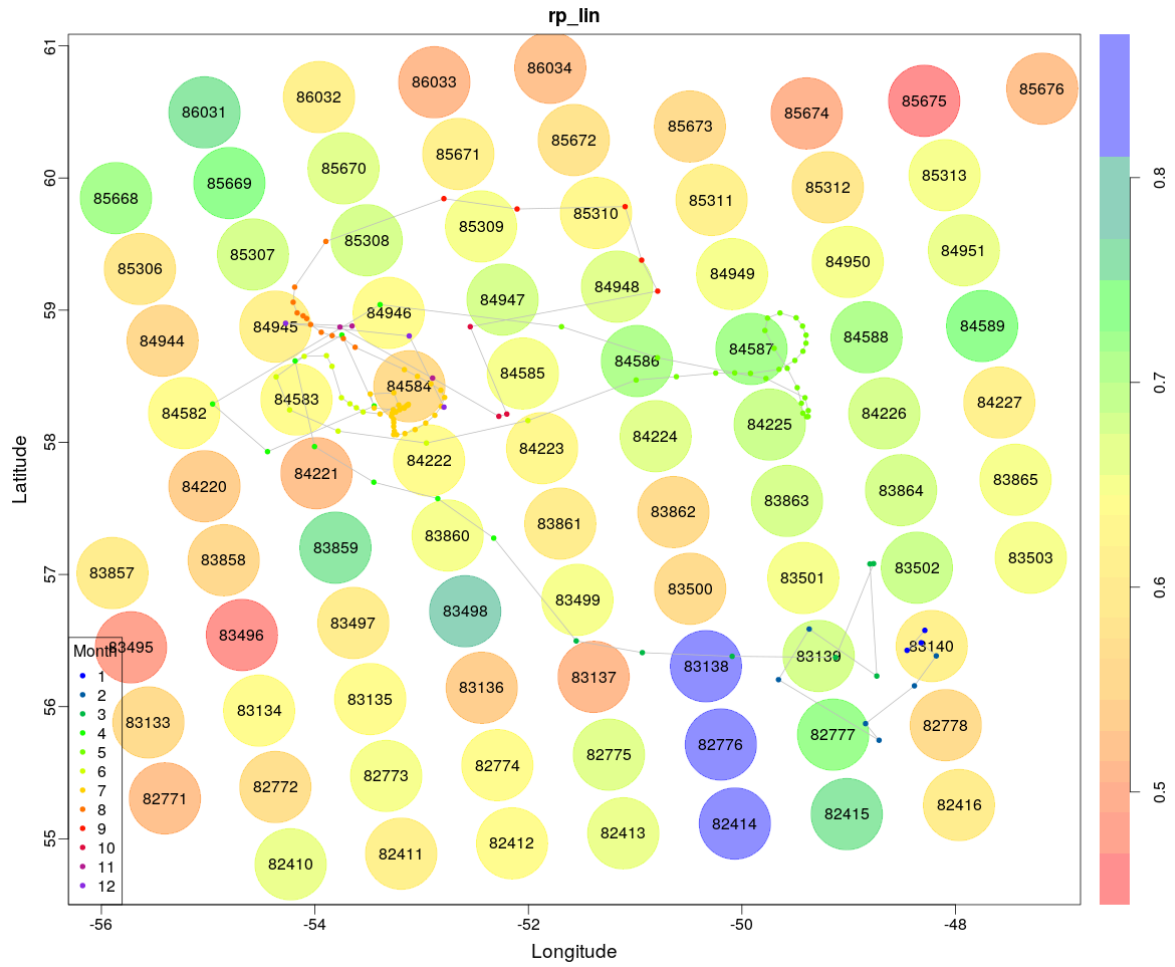

**Figure S2. Pearson's correlation between NEMO and BGC-Argo MLD over the annual cycle for float WMO 6901486, year 2015.**

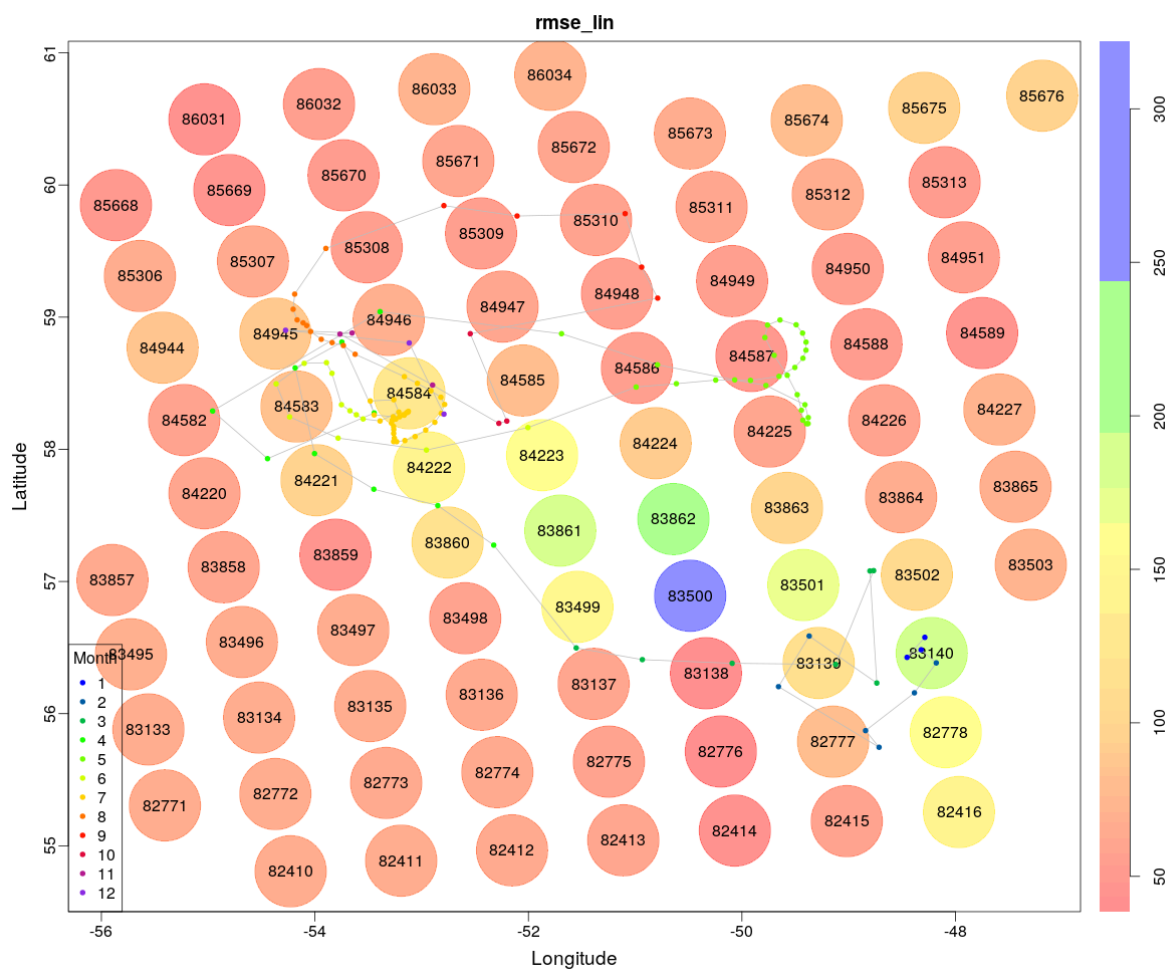

**Figure S3. RMSE between NEMO and BGC-Argo MLD over the annual cycle for float WMO 6901486, year 2015.**

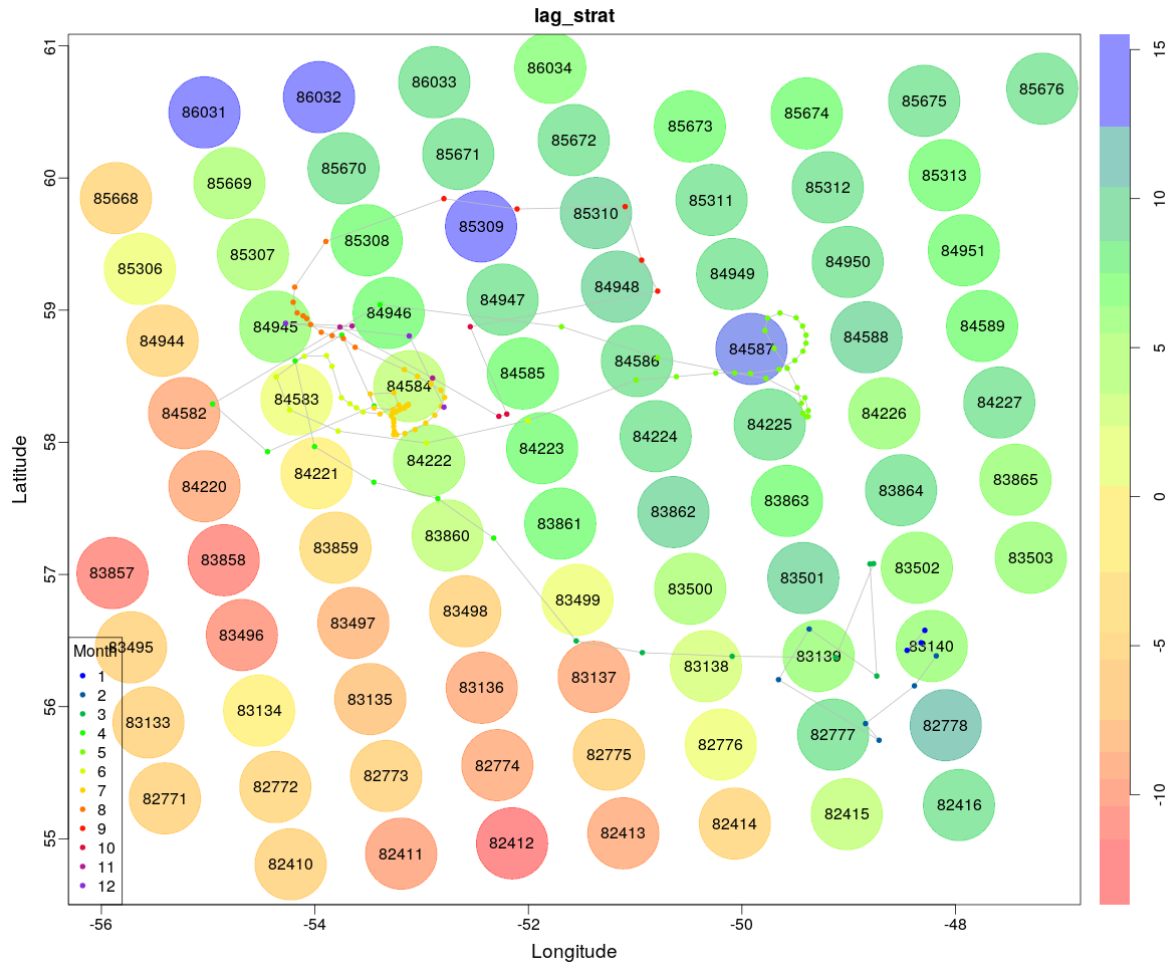

**Figure S4.** Time lag between the onset of permanent stratification in NEMO and BGC-Argo MLD over the annual cycle for float WMO 6901486, year 2015.

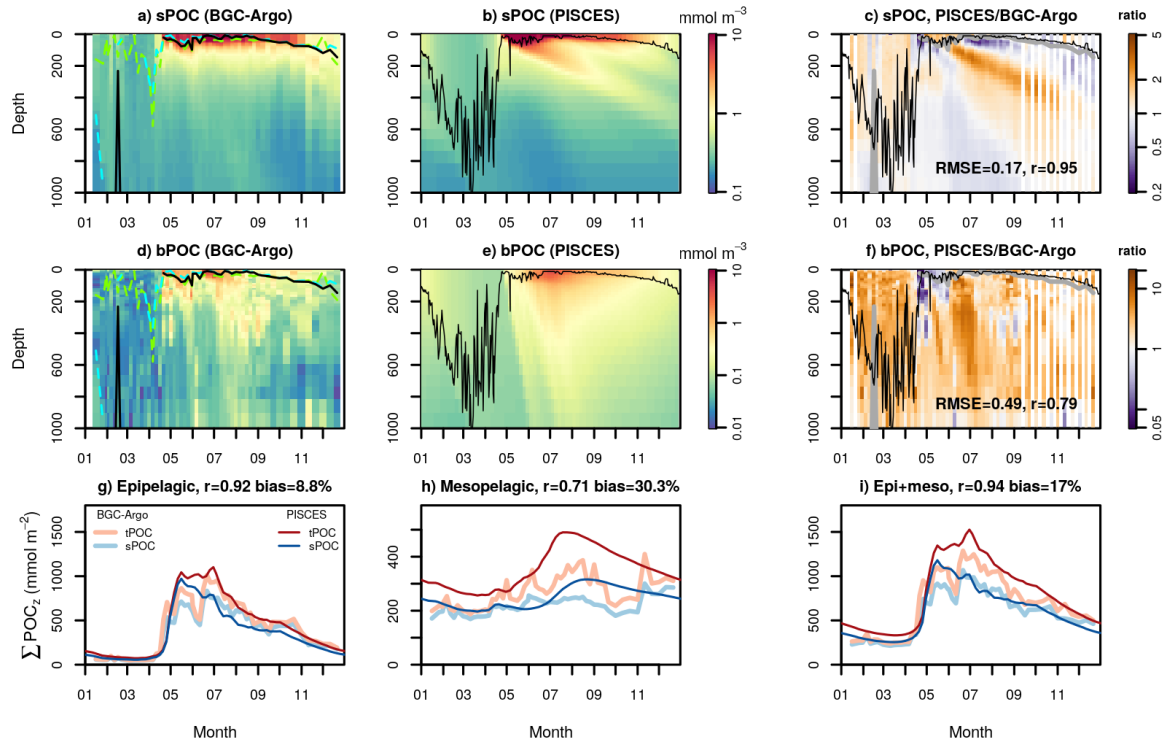

**Figure S5.** As Fig. 6 of the main text, with the same BGC-Argo dataset but using dynamical fields from a different model grid cell to force the PISCES 1D simulation.

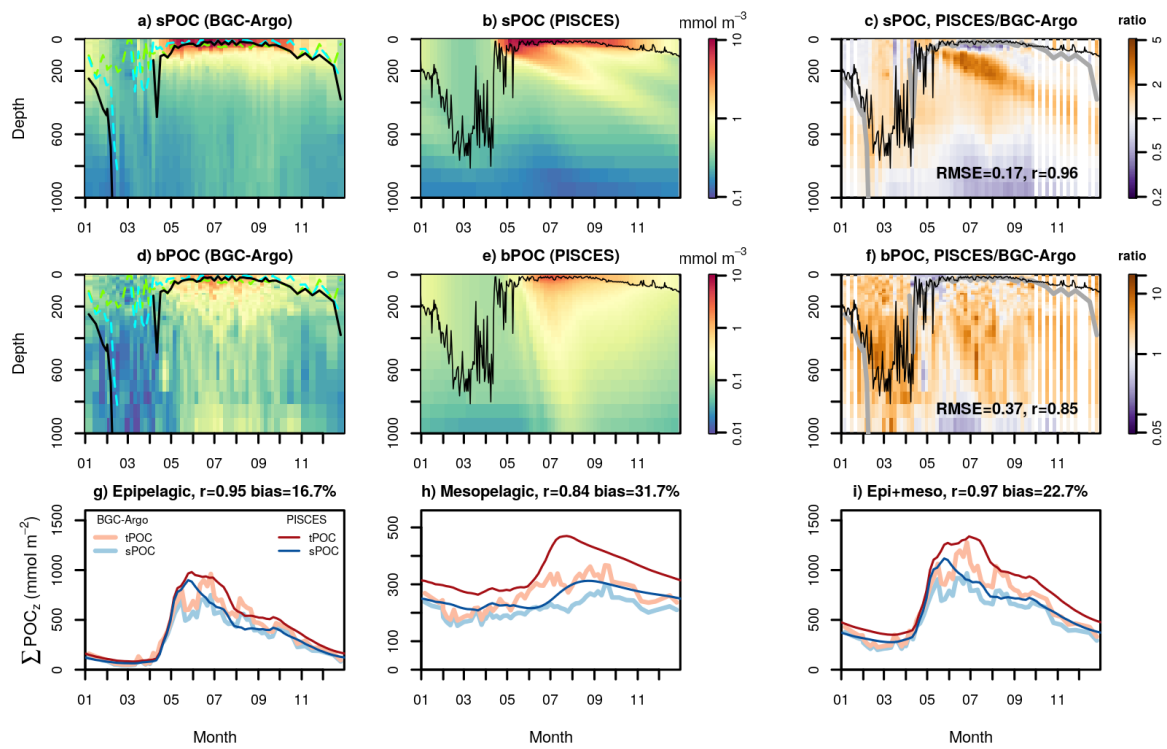

Figure S6. As Fig. 6 of the main text for float WMO 6901527, year 2016 (Labrador Sea).

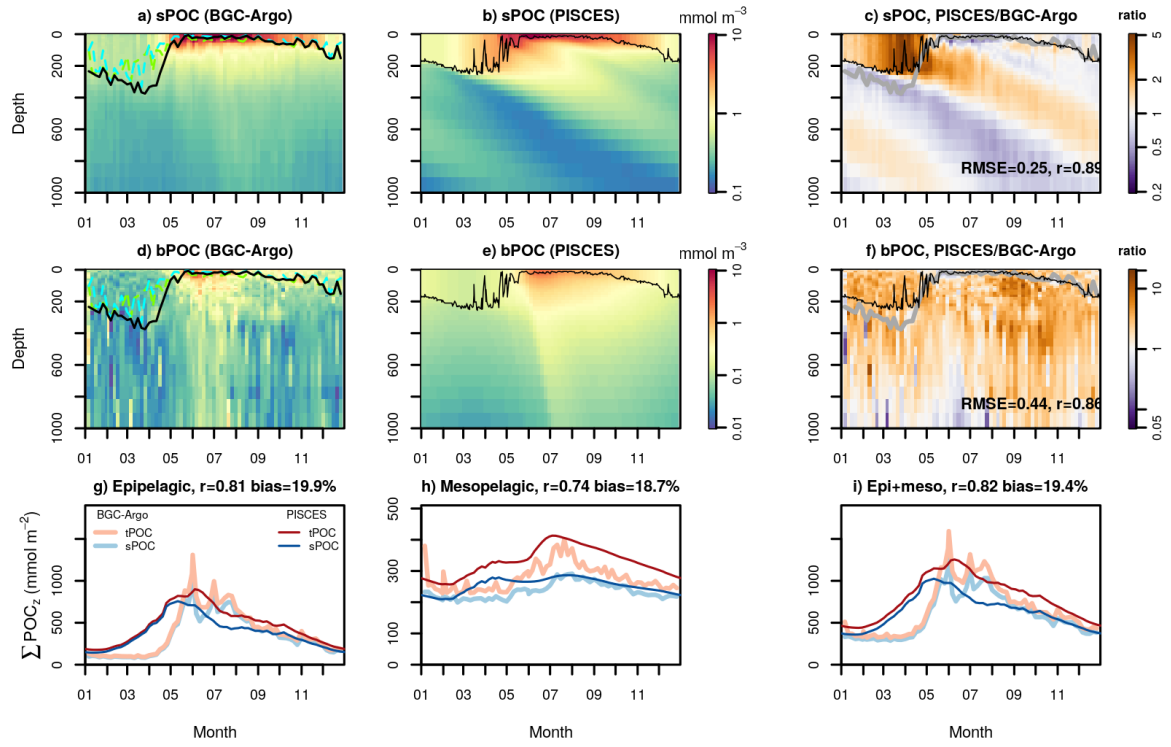

Figure S7. As Fig. 6 of the main text for float WMO 6901516, year 2014 (Iceland Basin).

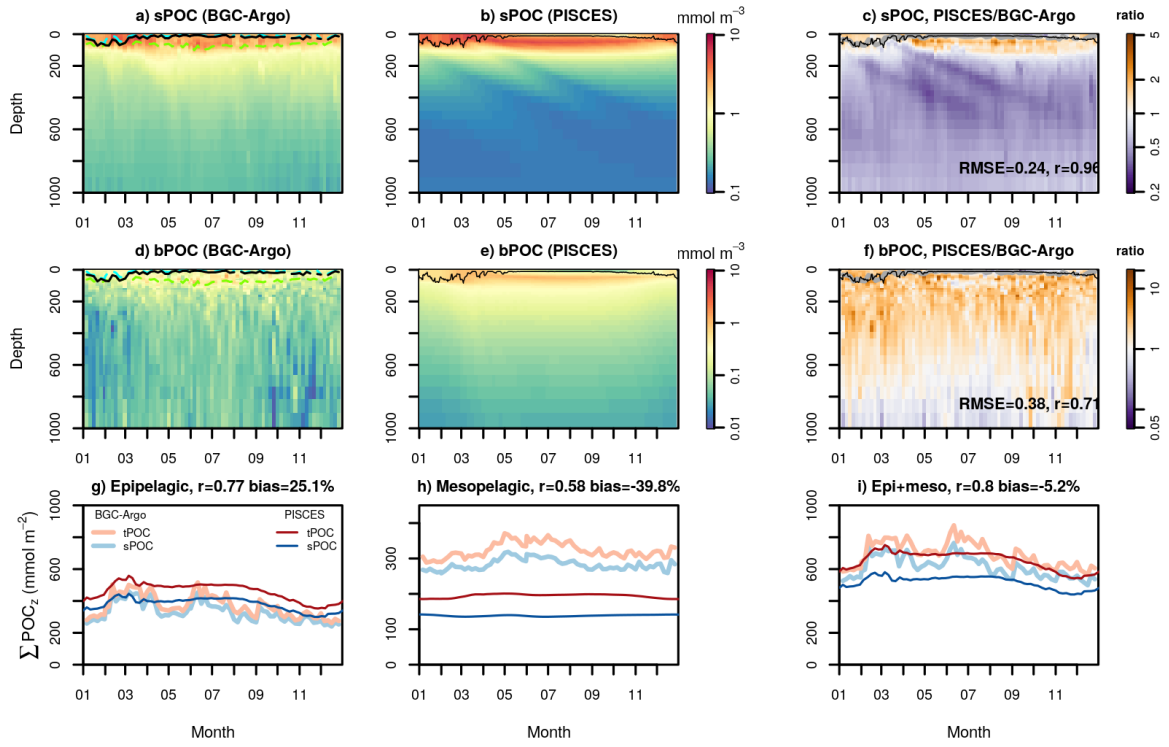

Figure S8. As Fig. 6 of the main text for float WMO 6901491, year 2014 (Tyrrhenian Sea, Mediterranean).



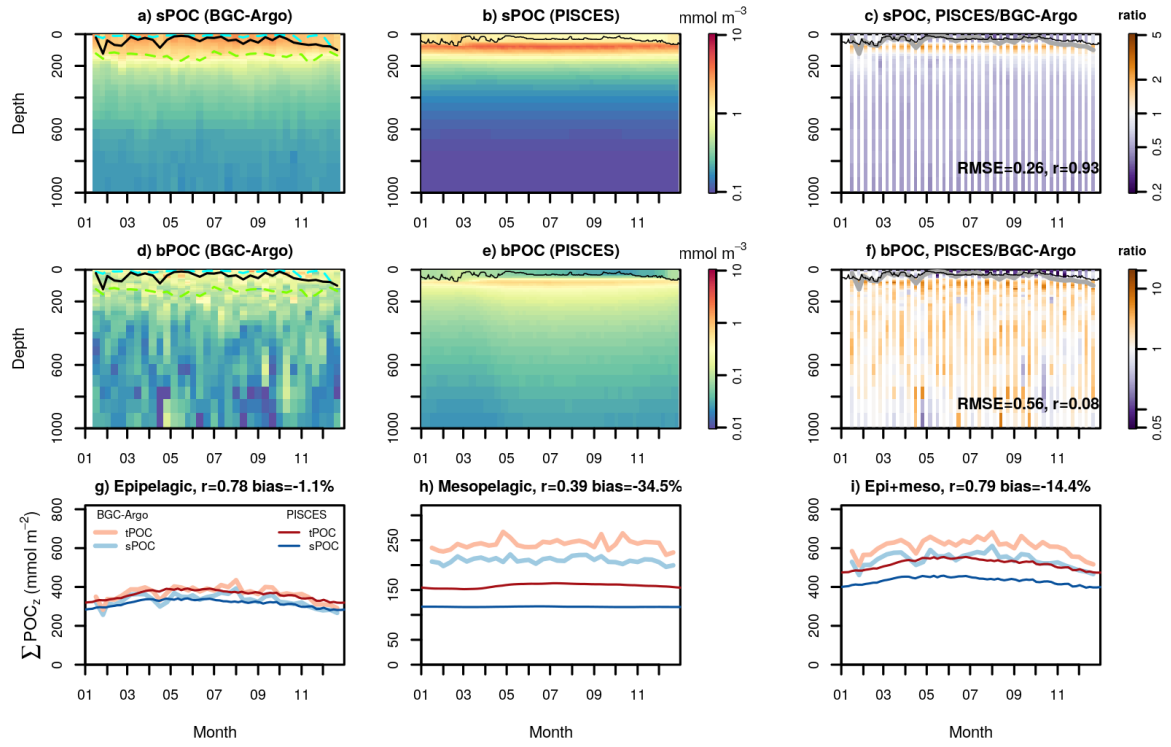

Figure S9. As Fig. 6 of the main text for float WMO 6901472, year 2013 (North Atlantic subtropical gyre).

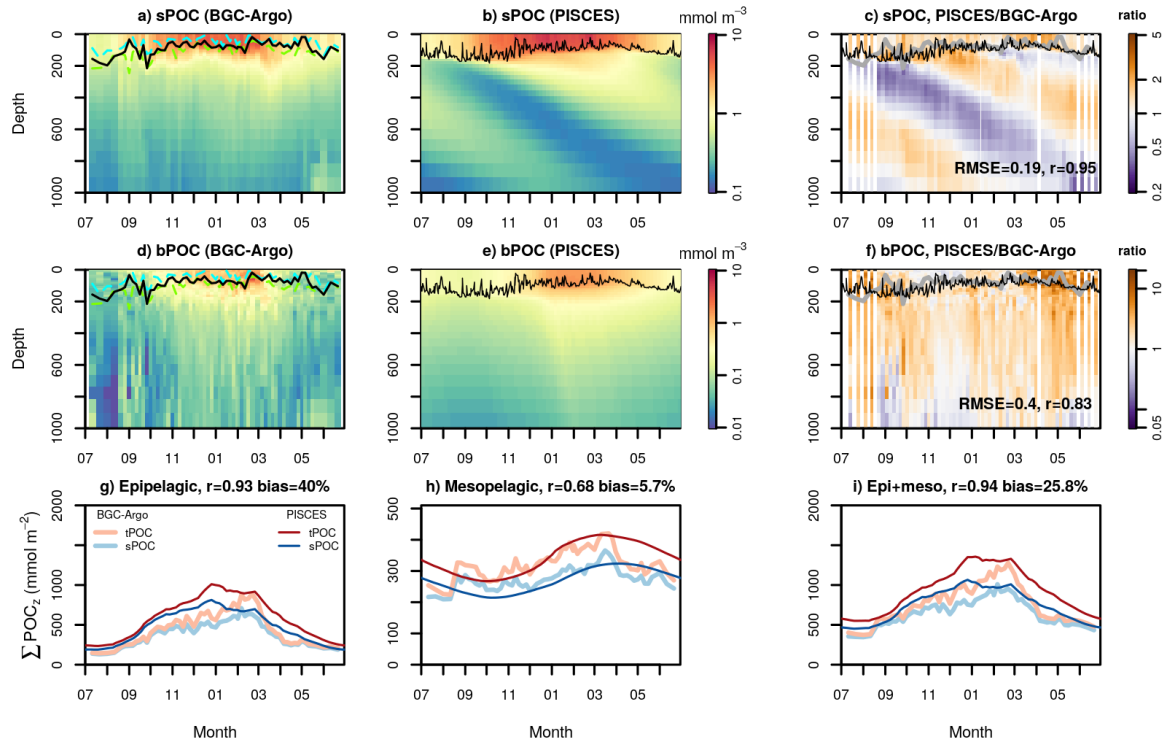

Figure S10. As Fig. 6 of the main text for float WMO 6901579, year 2015 (Indian sector of the Southern Ocean).

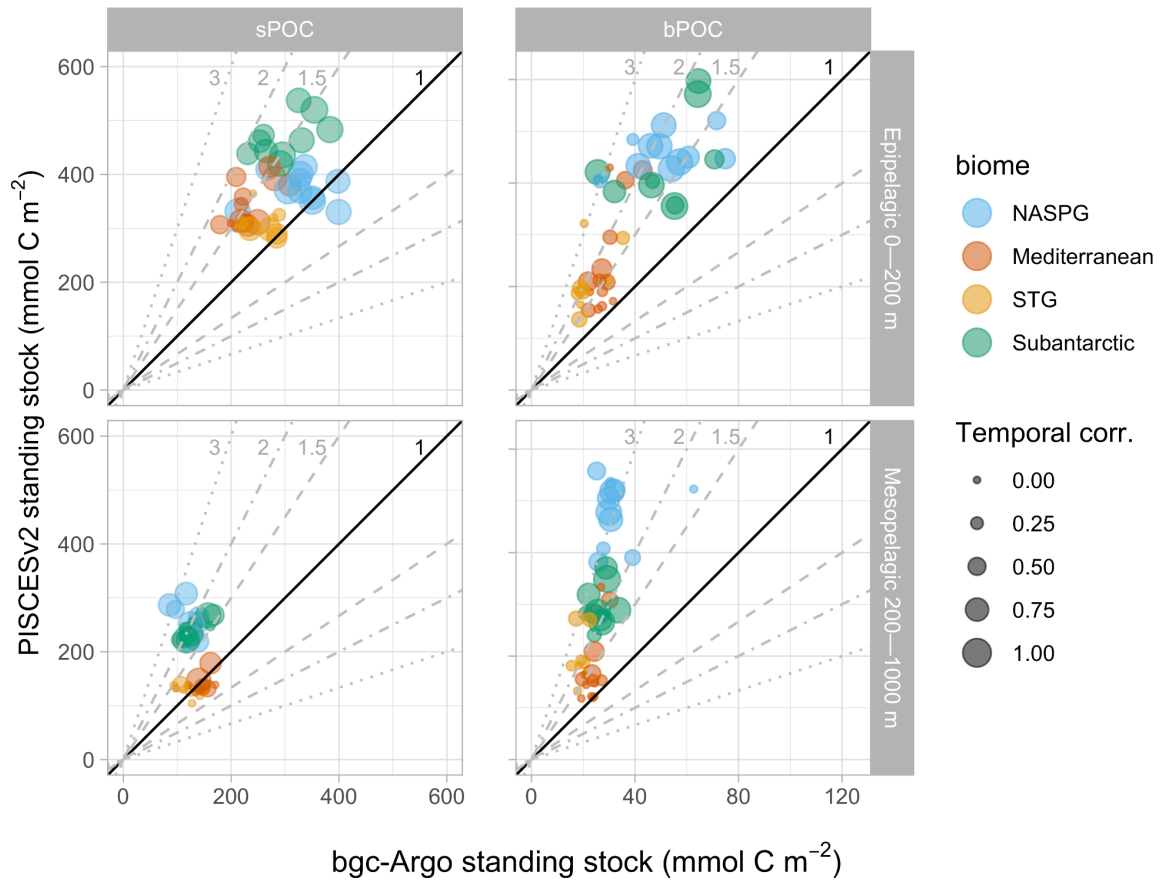

Figure S11. This figure is analogous to Figure 8 of the main paper, except that the asymptotic bbp700-POC conversion factor in deep waters (constant “c” in eq. 1) has been set to 500 mmol C m<sup>-2</sup> instead of 1000 mmol C m<sup>-2</sup>. BGC-Argo versus PISCES scatterplots are shown for small POC (sPOC) and big POC (bPOC) in the epi- and mesopelagic layers. Reference lines indicate a range of model: data ratios, from 1:1 (perfect correspondence) to a factor of 3 or its inverse. Biomes are distinguished with different colors, and the size of the circles is proportional to the correlation between BGC-Argo and PISCES stocks (as shown in the bottom panels of Figures 6 and 7).

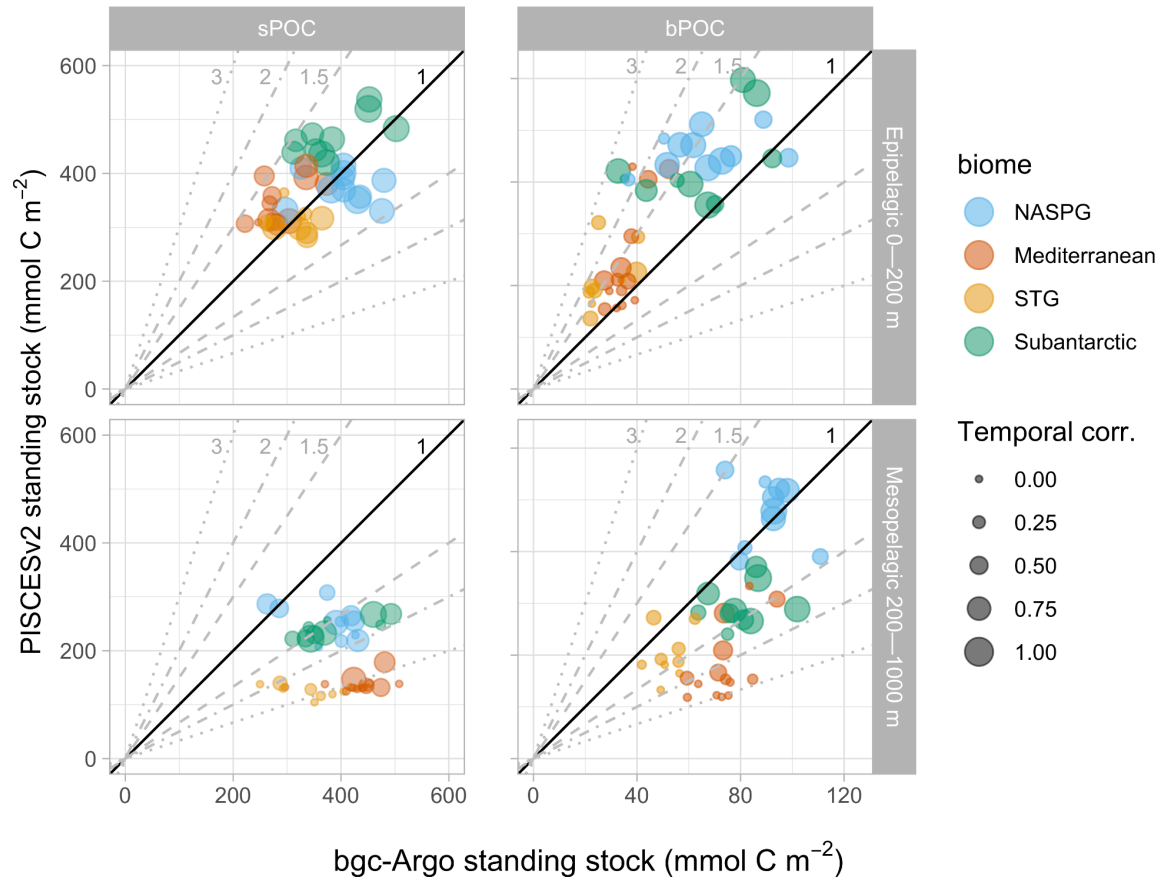

Figure S12. This figure is analogous to Figure 8 of the main paper, except that the asymptotic bbp700-POC conversion factor in deep waters (constant “c” in eq. 1) has been set to 2000 mmol C m<sup>-2</sup> instead of 1000 mmol C m<sup>-2</sup>. BGC-Argo versus PISCES scatterplots are shown for small POC (sPOC) and big POC (bPOC) in the epi- and mesopelagic layers. Reference lines indicate a range of model: data ratios, from 1:1 (perfect correspondence) to a factor of 3 or its inverse. Biomes are distinguished with different colors, and the size of the circles is proportional to the correlation between BGC-Argo and PISCES stocks (as shown in the bottom panels of Figures 6 and 7).



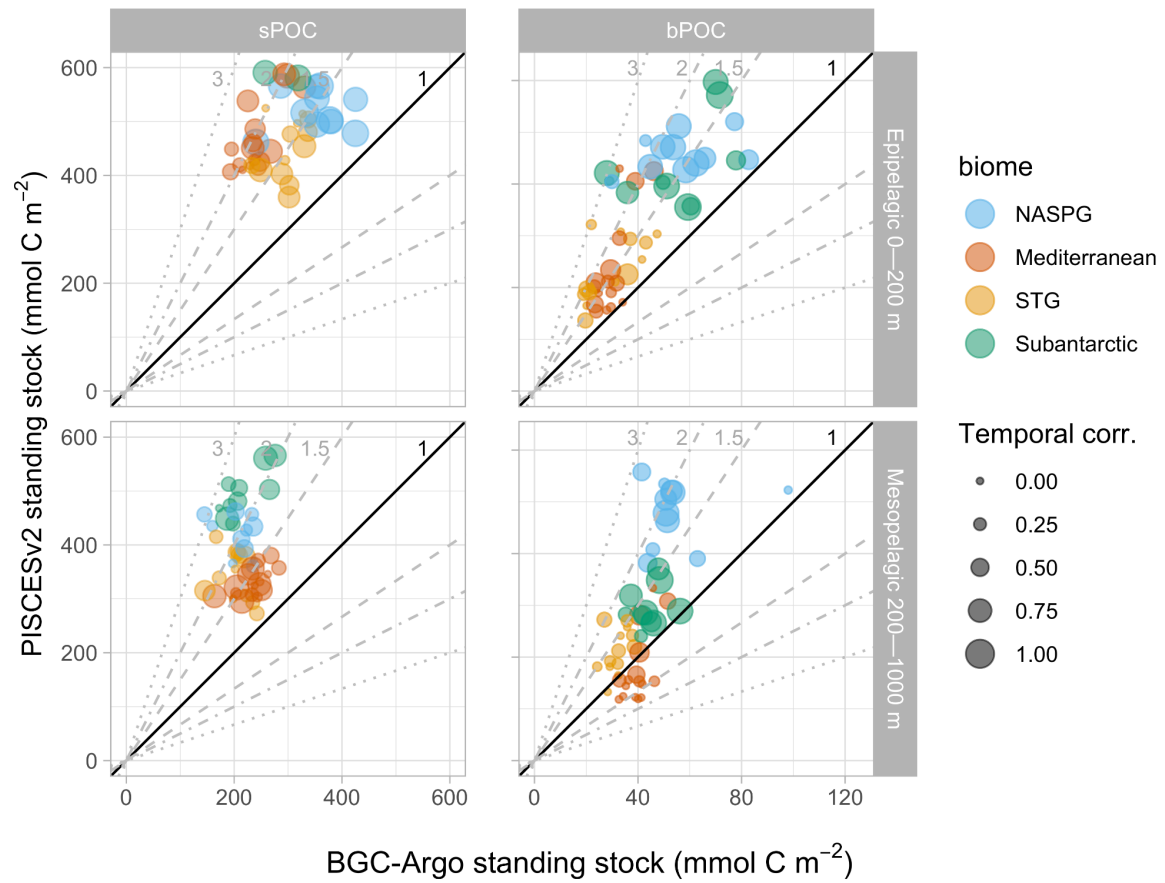

Figure S14. Alternative version of Fig. 8, including heterotrophic prokaryotes' biomass (*BACT*) diagnosed within PISCES using a simple empirical relationship.

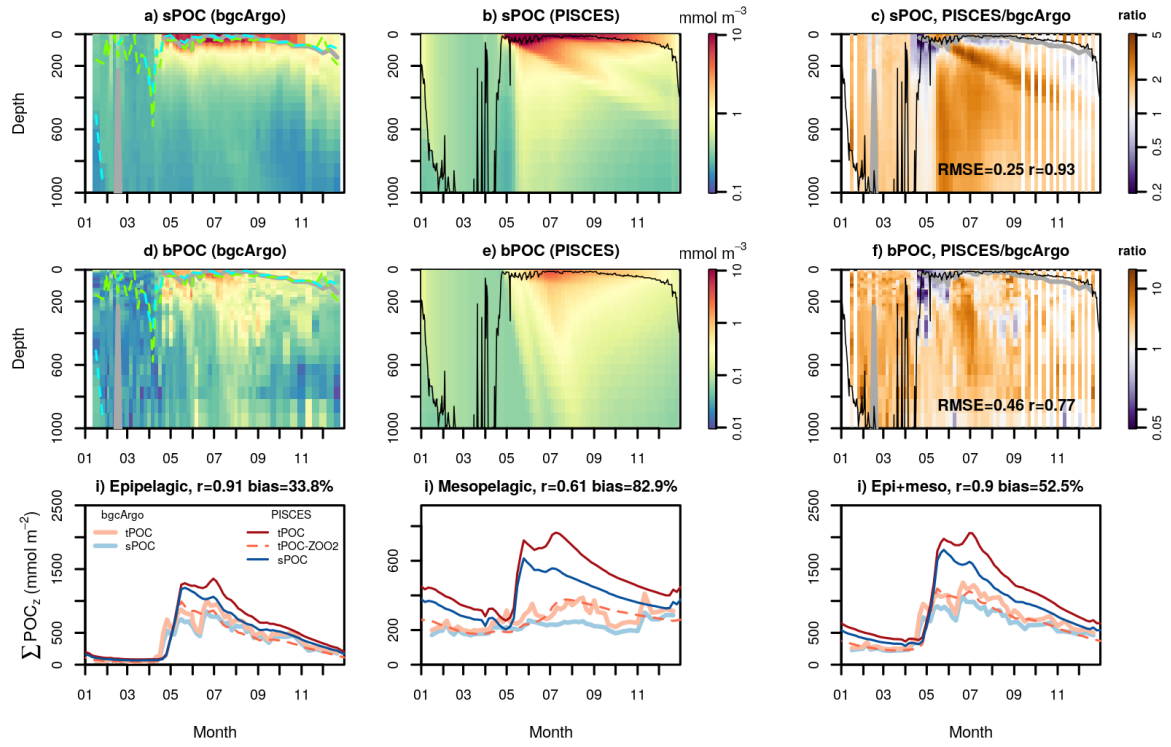

**Figure S15. Alternative version of Fig. 6 of the main text including heterotrophic prokaryotes' biomass (*BACT*) diagnosed within PISCES using a simple empirical relationship.**

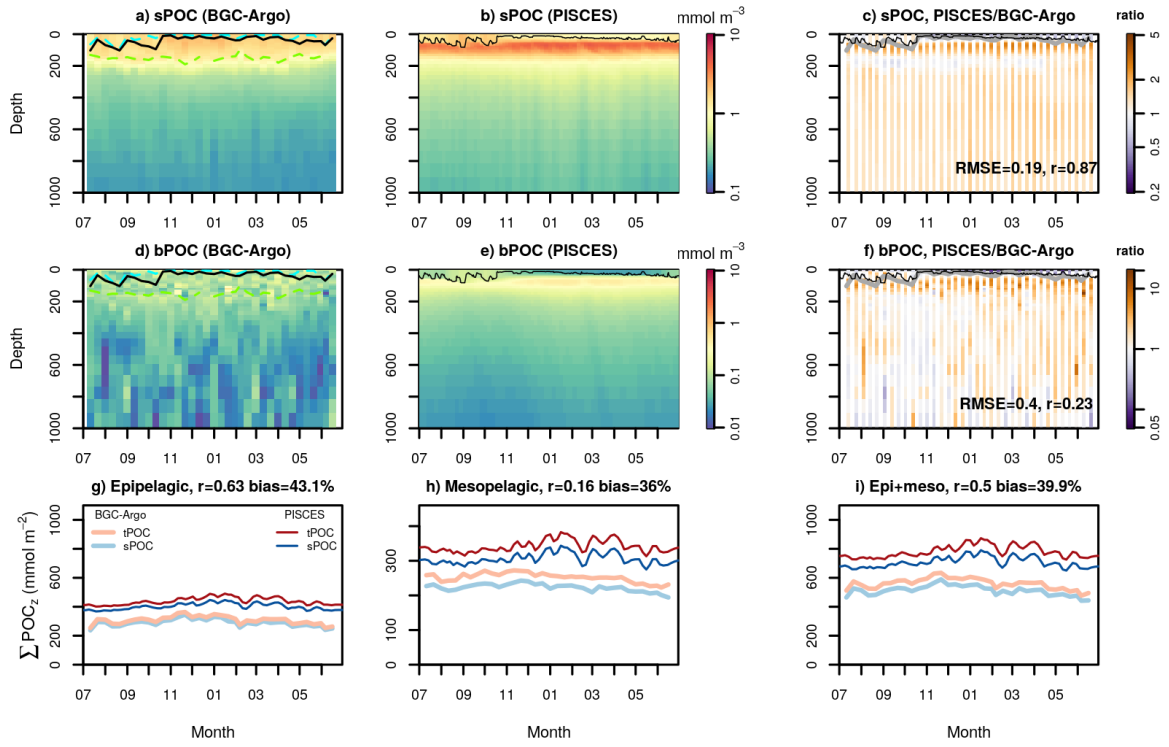

**Figure S16. Alternative version of Fig. 7 of the main text including heterotrophic prokaryotes' biomass (*BACT*) diagnosed within PISCES using a simple empirical relationship.**



## Supplemental tables

**Table S1.** List of coherent annual time series (CATS) and their correspondence with ORCA1 grid cells where PISCES 1D simulations were run. This list is linked to the repository <https://doi.org/10.5281/zenodo.5139602>.

| Biome         | Subregion or basin | Float WMO | Year              | Grid cell # |
|---------------|--------------------|-----------|-------------------|-------------|
| NASPG         | Labrador Sea       | 6901480   | 2015              | 84220       |
|               |                    |           | 2016              | 84222       |
|               |                    | 6901486   | 2015              | 83138       |
|               |                    | 6901524   | 2014              | 83866       |
|               |                    |           | 2016              | 82061       |
|               |                    | 6901527   | 2014              | 83858       |
|               |                    |           | 2015              | 84586       |
|               |                    | 6901527   | 2016              | 83504       |
|               | Iceland Basin      | 6901516   | 2014              | 81705       |
|               |                    | 6901516   | 2015              | 82432       |
|               |                    | 6901647   | 2015              | 85335       |
|               |                    | 6901647   | 2016 <sup>a</sup> | 85343       |
| Mediterranean | NW Med.            | 6901648   | 2015              | 74865       |
|               | SW Med.            | 6901513   | 2014              | 73418       |
|               | Tyrrhenian Sea     | 6901491   | 2014              | 74147       |
|               | Ionian Sea         | 6901510   | 2014              | 72708       |
|               |                    | 6901529   | 2014              | 74155       |
|               | Levantine Sea      | 6901528   | 2014              | 71269       |
|               |                    | 6901764   | 2016              | 71993       |
|               |                    |           | 2017              | 71994       |
|               |                    | 6901765   | 2016              | 72348       |
|               |                    |           | 2017              | 72710       |
|               |                    | 6901766   | 2016              | 72355       |
|               |                    |           | 2018              | 71270       |

|              |                           |         |      |       |
|--------------|---------------------------|---------|------|-------|
|              |                           | 6901768 | 2016 | 73432 |
|              |                           |         | 2017 | 72706 |
|              |                           | 6901773 | 2017 | 71634 |
|              |                           |         | 2018 | 71274 |
| STG          | North Atlantic STG        | 6901472 | 2013 | 66496 |
|              |                           |         | 2014 | 66495 |
|              |                           |         | 2015 | 66496 |
|              |                           |         | 2016 | 66493 |
|              |                           |         | 2017 | 65768 |
|              | South Pacific STG         | 6901658 | 2015 | 41020 |
|              |                           |         | 2016 | 41736 |
|              |                           | 6901660 | 2015 | 41032 |
|              |                           |         | 2016 | 40676 |
|              |                           |         | 2017 | 41040 |
|              |                           | 6902701 | 2016 | 40323 |
|              |                           |         | 2017 | 39601 |
|              |                           | 6902740 | 2017 | 39718 |
| Subantarctic | Indian sector             | 6901574 | 2015 | 26421 |
|              |                           | 6901579 | 2015 | 26419 |
|              |                           | 6901580 | 2015 | 26079 |
|              |                           | 6901581 | 2015 | 26804 |
|              |                           |         | 2016 | 24665 |
|              | Atlantic to Indian sector | 6901583 | 2015 | 27843 |
|              |                           |         | 2016 | 27520 |
|              |                           |         | 2017 | 27547 |
|              |                           | 6901585 | 2015 | 25658 |
|              |                           |         | 2016 | 23491 |
